# Supplementary material
Source: PubMed Central journal article supplement (PMC3690809)

Table S1: List of Antibodies

| Antibody                                                          | Vendor                                              | Catalog Number |
|-------------------------------------------------------------------|-----------------------------------------------------|----------------|
| Keratin 5 (K5)                                                    | Covance                                             | PRB-160P       |
| Keratin 8 (K8)                                                    | Developmental Studies Hybridoma Bank (Univ of Iowa) | TROMA-1        |
| BrdU                                                              | BD Biosciences                                      | 347583         |
| CD24-APC (Clone M1/69)                                            | Biolegend                                           | 101814         |
| CD49f-FITC (Clone GoH3)                                           | Stem Cell Technologies                              | 10111          |
| CD29-Pacific Blue                                                 | Biolegend                                           | 102224         |
| Biotinylated goat anti-rabbit                                     | Vector Laboratories                                 | BA-1000        |
| Biotinylated goat anti-rat                                        | Vector Laboratories                                 | BA-9400        |
| Mouse Mammary Stem Cell Enrichment Kit (CD45, TER119, CD31, BP-1) | Stem Cell Technologies                              | 19757C.1       |

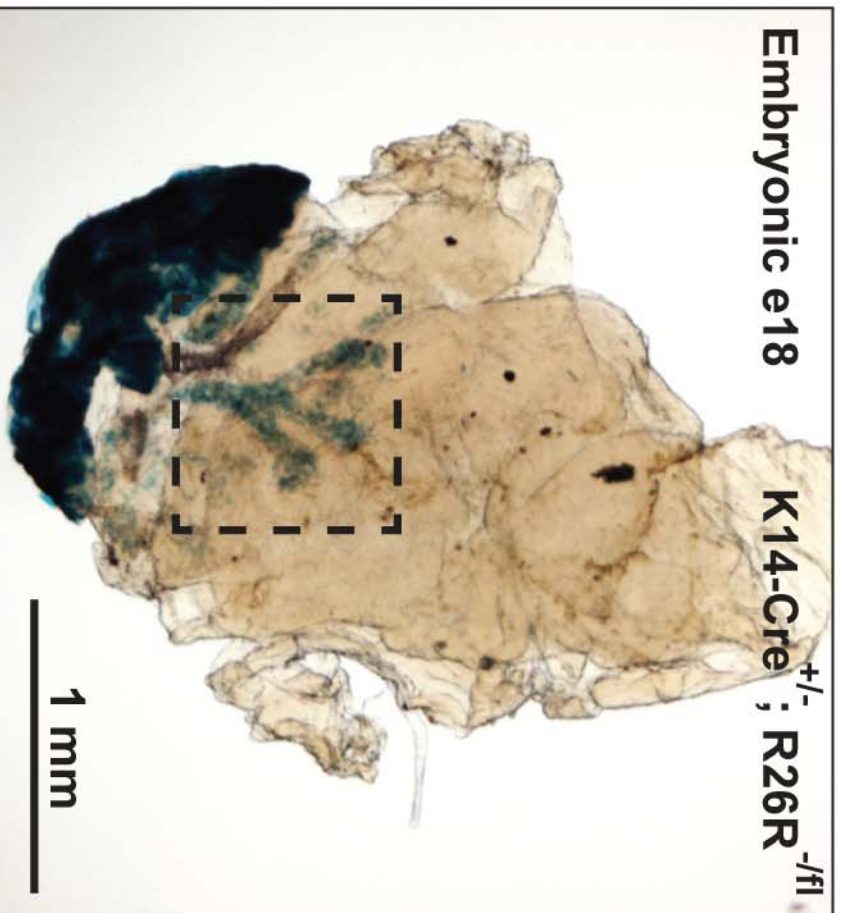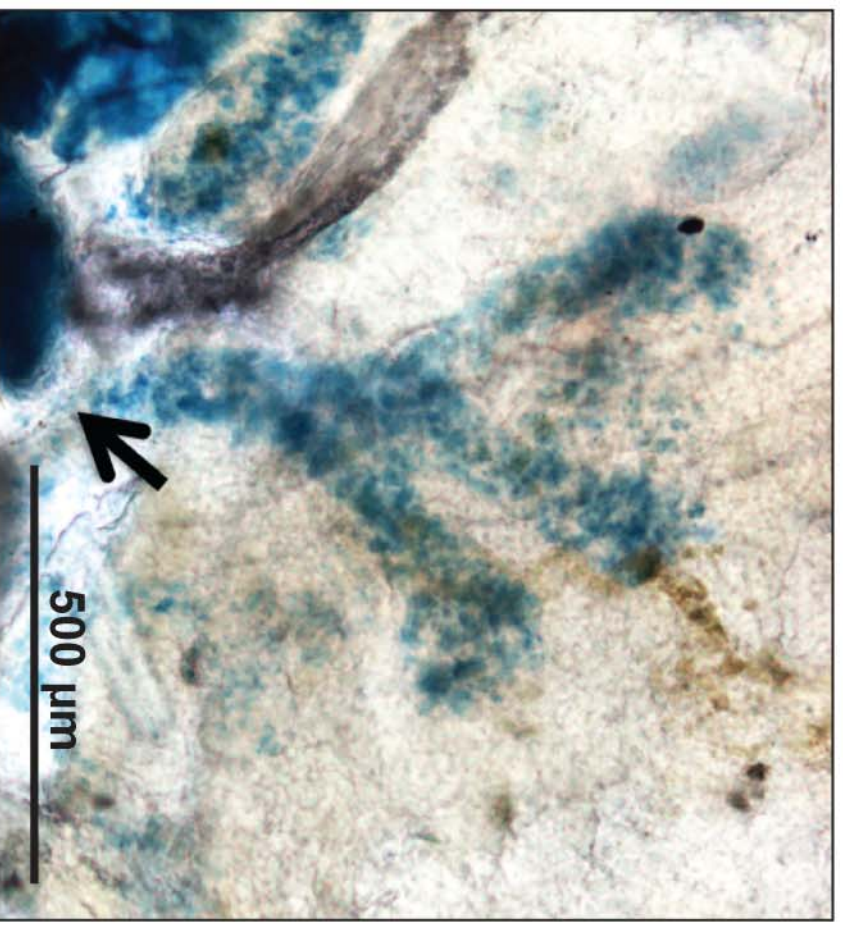

$FGFR1^{fl/+}; K14-Cre^{+/-}; R26R^{-/fl}$        $FGFR1^{fl/fl}; K14-Cre^{+/-}; R26R^{-/fl}$

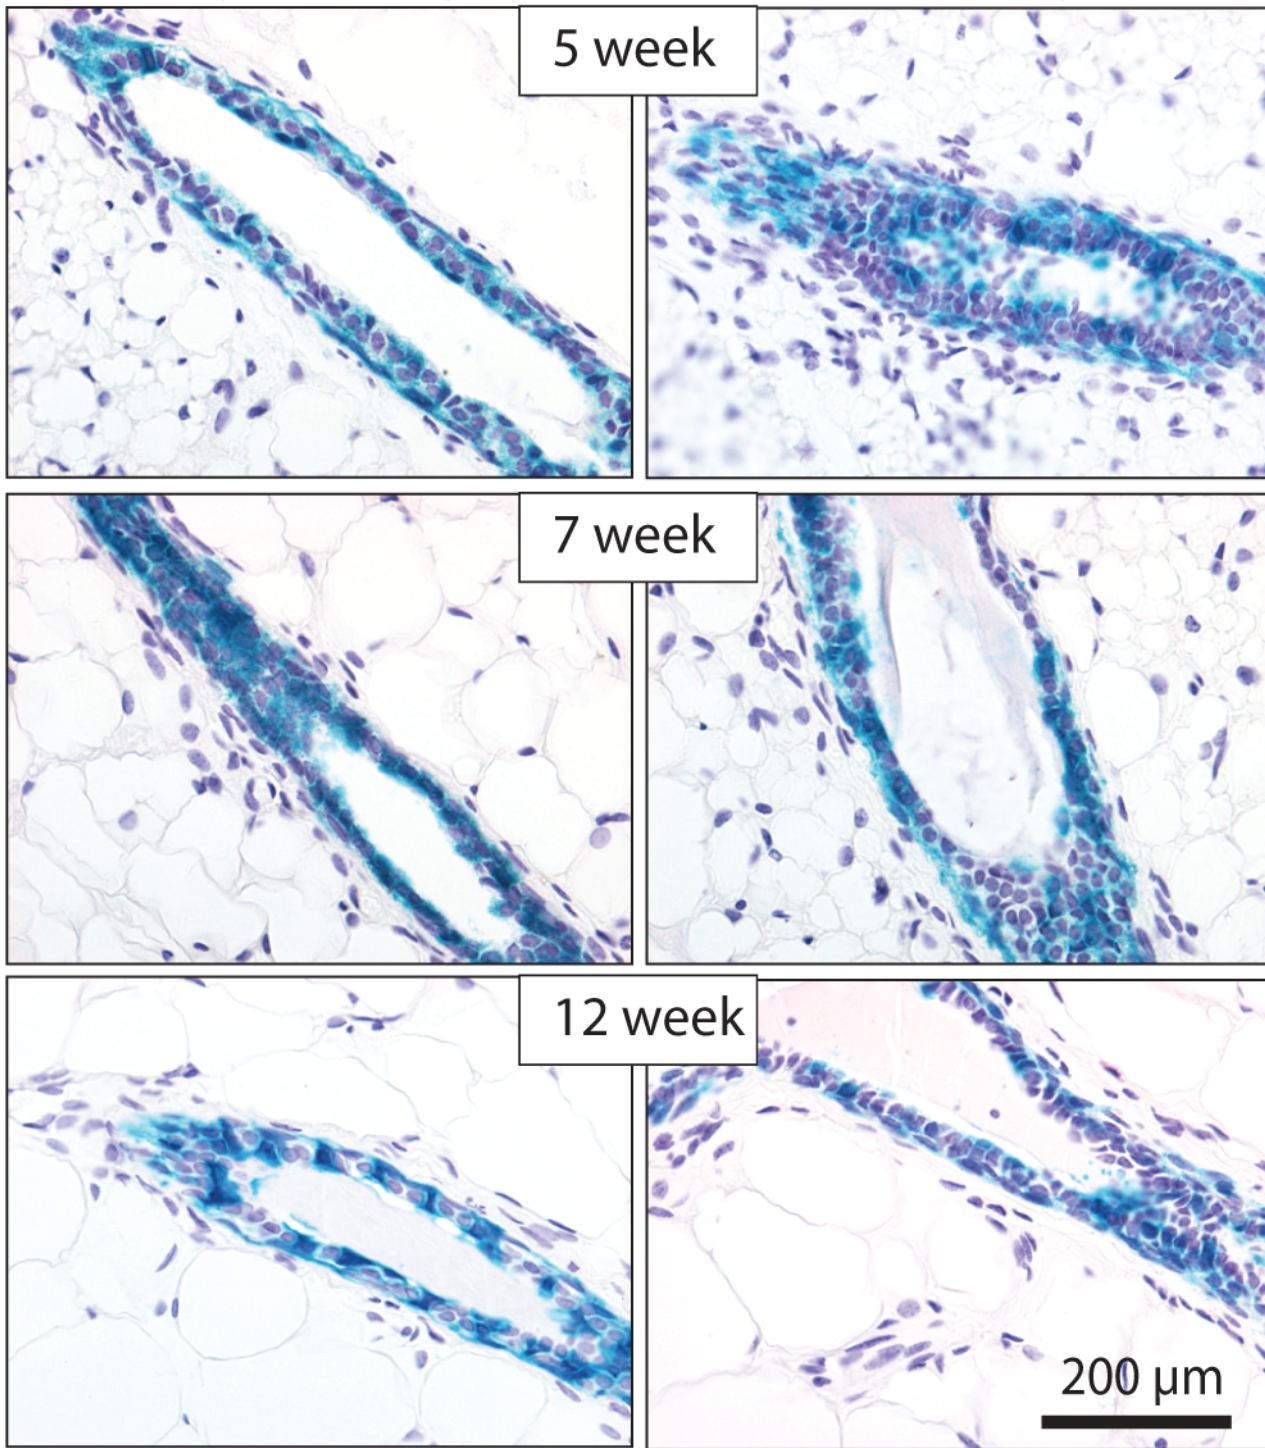

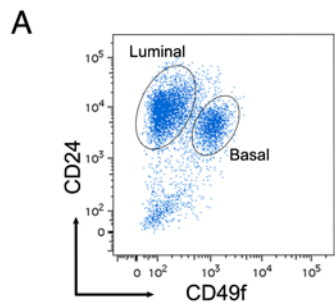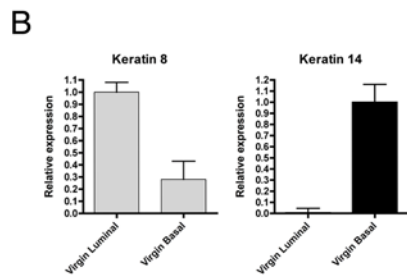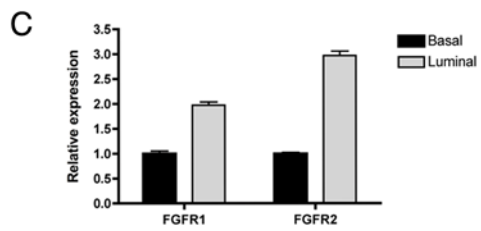

Supplement: NIHMS462753-supplement-Pond_Supplementary_Data.pdf [file NIHMS462753-supplement-Pond_Supplementary_Data.pdf]
